# Supplementary material for: Ground golf-induced changes in the blood pressure of healthy elderly people
Source: J Physiol Anthropol. 2020 Apr 5;39:8. doi: 10.1186/s40101-020-00220-2 (PMC7132973; doi:10.1186/s40101-020-00220-2)
Supplement: Supplementary file 1 — Additional file 1. [file 40101_2020_220_MOESM1_ESM.xlsx]

## Sheet: Sheet1
N=13
SBP mmHg
	Tanoue	Tone	Sakamoto	Ishihara S	Takeda	Kosai	Tateyama	Nishimura	Ishihsra T	Yamaguchi	Hamada	Shimamoto	Murakami		AVERAGE	SD	SE
rest	127	137	123	201	142	158	145	153	177	166	154	121	169		151.769	22.1052	6.38122
G1	134	125	128	187	146	121	133	163	153	168	144	143	166		147	18.8231	5.43375
G2	126	125	122	191	133	120	134	139	141	145	139	137	163		139.615	18.387	5.30788
G3	137	121	117	172	132	110	128	144	130	138	138	167	159		137.923	17.9506	5.1819
G4	137	124	120	179	135	103	126	139	135	142	158	130	162		137.692	18.9021	5.45657
G5	136	121	106	176	144	105	125	145	129	131	121	129	151		132.231	18.2721	5.2747
G6	116	118		179	133	122	143	146	138	135	137	129	145		136.75	15.9589	4.60695
DBP mmHg
	Tanoue	Tone	Sakamoto	Ishihara S	Takeda	Kosai	Tateyama	Nishimura	Ishihsra T	Yamaguchi	Hamada	Shimamoto	Murakami		AVERAGE	SD	SE
rest	82	91	90	120	83	90	90	89	111	98	80	59	108		91.6154	14.8611	4.29003
G1	83	81	80	110	84	75	86	90	66	101	80	63	104		84.8462	13.254	3.8261
G2	82	79	78	96	79	70	83	64	67	93	81	72	99		80.2308	10.3564	2.98963
G3	87	79	79	86	78	68	77	77	66	86	77	89	96		80.3846	7.98593	2.30534
G4	86	77	80	91	82	69	71	83	69	84	88	67	84		79.3077	7.64988	2.20833
G5	87	78	72	93	83	67	79	85	67	84	71	57	90		77.9231	10.1106	2.91869
G6	77	76		105	78	78	90	80	68	82	75	77	78		80.3333	8.86316	2.55857
MAP mmHg
	Tanoue	Tone	Sakamoto	Ishihara S	Takeda	Kosai	Tateyama	Nishimura	Ishihsra T	Yamaguchi	Hamada	Shimamoto	Murakami		AVERAGE	SD	SE
rest	97	106.333	101	147	102.667	112.667	108.333	110.333	133	120.667	104.667	79.6667	128.333		111.667	16.6122	4.79554
G1	100	95.6667	96	135.667	104.667	90.3333	101.667	114.333	95	123.333	101.333	89.6667	124.667		105.564	13.9071	4.01464
G2	96.6667	94.3333	92.6667	127.667	97	86.6667	100	89	91.6667	110.333	100.333	93.6667	120.333		100.026	11.7673	3.39693
G3	103.667	93	91.6667	114.667	96	82	94	99.3333	87.3333	103.333	97.3333	115	117		99.5641	10.4279	3.01028
G4	103	92.6667	93.3333	120.333	99.6667	80.3333	89.3333	101.667	91	103.333	111.333	88	110		98.7692	10.6301	3.06863
G5	103.333	92.3333	83.3333	120.667	103.333	79.6667	94.3333	105	87.6667	99.6667	87.6667	81	110.333		96.0256	11.8426	3.41867
G6	90	90		129.667	96.3333	92.6667	107.667	102	91.3333	99.6667	95.6667	94.3333	100.333		99.1389	10.5176	3.03617
N=9
VE (L/min)
	Hamaguchi	Shimamoto	Murakami	Matsunaga	Yamaguchi	Ishihara	Takeda	Tateyama	Tanoue	AVERAGE	SD	SE
rest	9.49857	12.3133	7.45571	10.224	9.145	17.002	10.07	10.653	12.056	10.9353	2.55323	0.851078
G1	16.8042	18.6808	13.1627	18.3187	15.397	17.385	16.8138	16.1867	25.3455	17.566	3.15356	1.05119
G2	18.1346	17.1862	12.8889	18.6056	19.8407	19.6007	19.126	18	26.8533	18.9151	3.41945	1.13982
G3	18.7218	17.3355	13.45	18.755	20.1379	19.6429	18.5517	15.2192	27.0511	18.7628	3.56259	1.18753
G4	18.6117	16.1967	14.4764	19.7464	21.3736	18.92	17.6677	15.8662	26.8067	18.8517	3.44822	1.14941
G5	18.0315	16.4592	16.0942	21.3083	19.1485	19.4846	18.4733	16.5933	27.3533	19.2163	3.2804	1.09347
G6	13.3067	14.9147	8.67758	17.2519	14.354	12.5957	15.8884	13.1548	25.2125	15.0396	4.25039	1.4168
VO2 (L/min)
	Hamaguchi	Shimamoto	Murakami	Matsunaga	Yamaguchi	Ishihara	Takeda	Tateyama	Tanoue	AVERAGE	SD	SE
rest	0.265714	0.346667	0.207143	0.306	0.325	0.676	0.301111	0.32	0.396	0.349293	0.125504	0.0418348
G1	0.574167	0.665	0.430667	0.705333	0.628	0.708	0.619231	0.558333	1.07	0.662081	0.165136	0.0550453
G2	0.62	0.588462	0.407778	0.696111	0.796429	0.801429	0.72	0.607273	1.07778	0.701695	0.174968	0.0583227
G3	0.632727	0.576364	0.439167	0.696667	0.772143	0.805	0.661667	0.500833	1.09222	0.68631	0.181774	0.0605912
G4	0.636667	0.549167	0.476364	0.757273	0.846429	0.77	0.632308	0.513846	1.08222	0.69603	0.179995	0.0599984
G5	0.596923	0.526923	0.541667	0.8225	0.741538	0.799231	0.673333	0.560833	1.10667	0.707735	0.175482	0.0584941
G6	0.364583	0.438824	0.265455	0.560769	0.492571	0.500333	0.5084	0.392	1.00833	0.503474	0.197447	0.0658157
Cal (kcal)
	Hamaguchi	Shimamoto	Murakami	Matsunaga	Yamaguchi	Ishihara	Takeda	Tateyama	Tanoue	AVERAGE	SD	SE
G1	33.08	38.33	31	50.8	30.13	34.04	38.65	32.07	56.42	38.28	8.7493	2.91643
G2	38.67	36.76	35.26	60.06	53.55	53.79	34.57	32.14	46.55	43.4833	9.63713	3.21238
G3	33.35	30.41	25.26	40.18	51.87	54.11	38.18	28.76	47.23	38.8167	9.79115	3.26372
G4	36.69	31.59	25.14	40.02	56.86	51.72	39.46	32.01	46.82	40.0344	9.63071	3.21024
G5	37.21	32.87	31.27	47.36	46.21	49.93	38.82	32.36	47.84	40.43	7.03749	2.34583
G6	41.98	71.55	41.86	69.88	82.77	72.06	61.04	47.14	58.09	60.7078	13.8014	4.60048
SUM	220.98	241.51	189.79	308.3	321.39	315.65	250.72	204.48	302.95	261.752	48.2794	16.0931
